# Supplementary material for: Chalcogen-bridged coordination polymer for the photocatalytic activation of aryl halides
Source: PubMed Central journal article supplement (PMC10326065; doi:10.1038/s41467-023-39540-z), 2023-07-06
Supplement: 41467_2023_39540_MOESM2_ESM.pdf [file 41467_2023_39540_MOESM2_ESM.pdf]

## **Description of Additional Supplementary Files**

File Name: Supplementary Data 1

Description: checkCIF of Cd-SNDI

File Name: Supplementary Data 2

Description: checkCIF of Cd-NDI

File Name: Supplementary Data 3

Description: checkCIF of Pyrene@Sr-NDI
